# Supplementary material for: Rosin-Based Epoxy Vitrimers with Dynamic Boronic Ester Bonds
Source: MDPI journal article supplement (doi:10.3390/polym13193386), 2021-10-01
Supplement: s1 [file s1]

# Rosin-Based Epoxy Vitrimers with Dynamic Boronic Ester Bonds

Yanning Zeng\* Jiawei Li, Shuxin Liu and Bin Yang

Key Laboratory of New Processing Technology for Nonferrous Metal and Materials (Ministry of Education), and College of Material Science and Engineering, Guilin University of Technology, Guilin 541004, P. R. China

\* Correspondence: Corresponding author: E-mail: ynzeng@glut.edu.cn

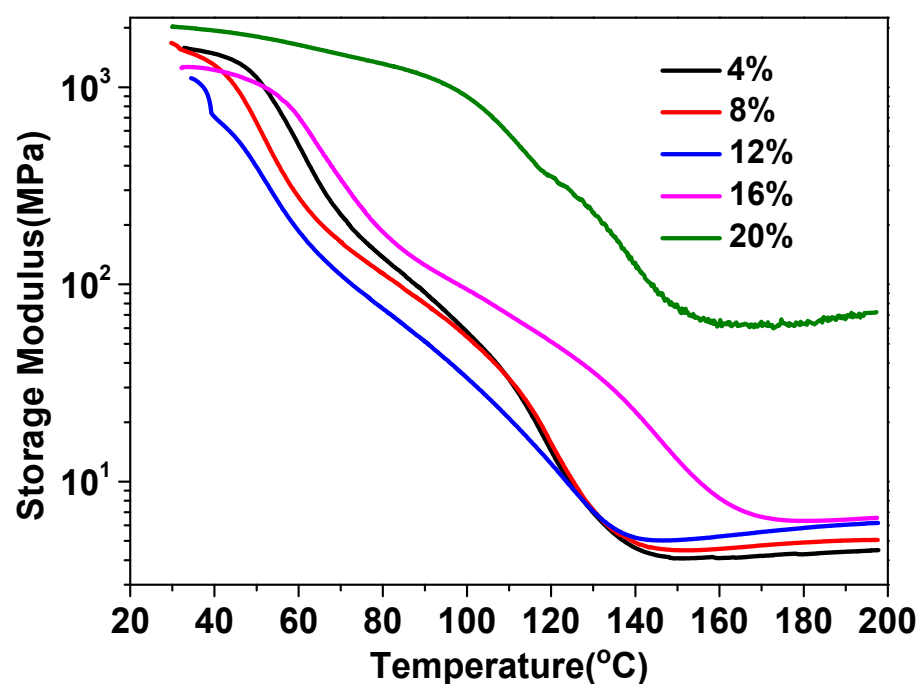

**Figure S1** Storage module curves.

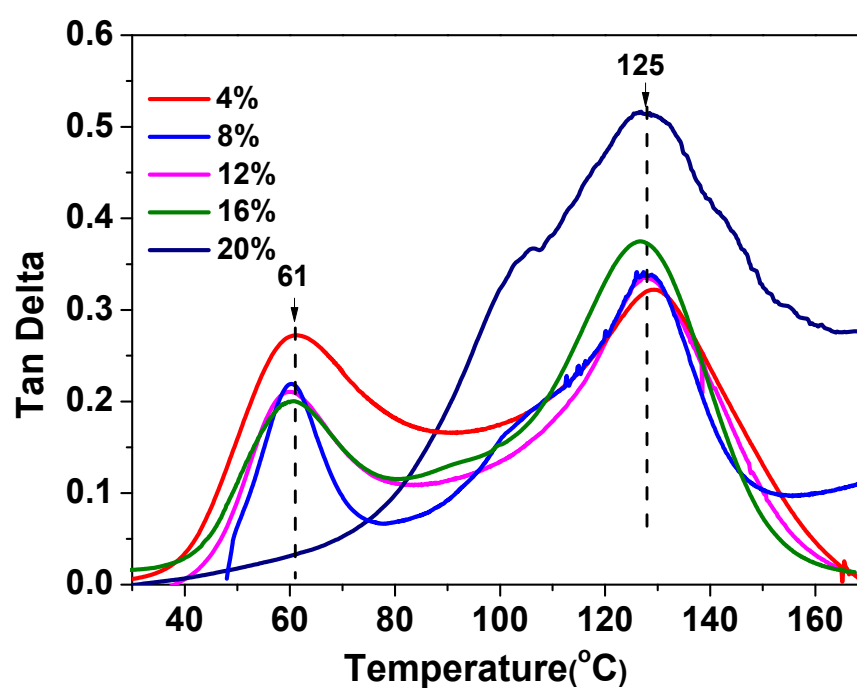

**Figure S2** Tan  $\delta$  curves of C-FPAE series from the DMA.

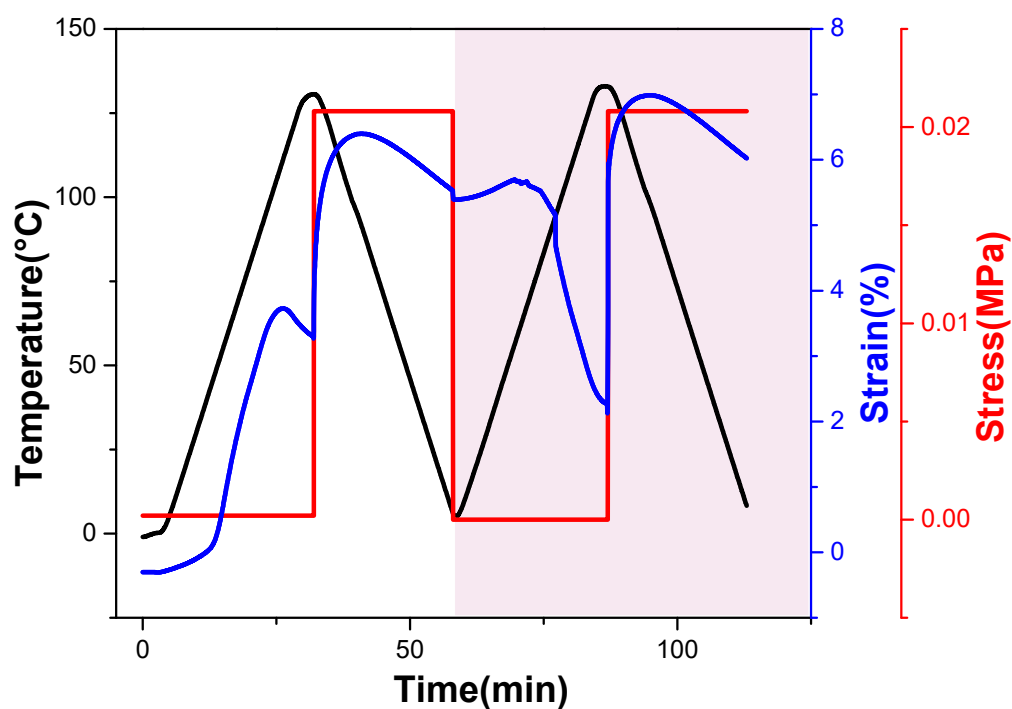

**Figure S3** Consecutive shape memory cycles curves of 20% C-FPAE.

Shape fixation ratio ( $R_f$ ) and shape recovery ratio ( $R_r$ ) of 20% C-FPAE is defined as following equations. Where  $\varepsilon_1$ ,  $\varepsilon_2$  and  $\varepsilon_m$  are the strain after programming, residual strain after heating for shape recovery and maximum programming strain, respectively.

$$R_f = \frac{\varepsilon_1}{\varepsilon_m}$$

$$R_r = \frac{\varepsilon_1 - \varepsilon_2}{\varepsilon_1}$$

**Table S1.** The crosslinking density and other swell parameter of the C-FPAE series with different BDB contents

| Sample     | Swelling ratio | Sol fraction (%) | $m_o$<br>(mg) | $m_1$<br>(mg) | $\rho_0$<br>(g/cm <sup>3</sup> ) | Cd<br>(mol/cm <sup>3</sup> ) |
|------------|----------------|------------------|---------------|---------------|----------------------------------|------------------------------|
| 4% C-FPAE  | 55.7           | 24.2             | 51.5          | 94.2          | 0.98                             | 0.33                         |
| 8% C-FPAE  | 47.8           | 12.5             | 83.2          | 114.8         | 1.02                             | 0.37                         |
| 12% C-FPAE | 30.7           | 5.2              | 71.6          | 91.7          | 1.08                             | 0.49                         |
| 16% C-FPAE | 20.7           | 2.3              | 463.1         | 573.3         | 1.15                             | 0.79                         |
| 20% C-FPAE | 12.9           | 0.6              | 34.8          | 41.1          | 1.18                             | 0.85                         |

*Article, Review, Communication, etc.)*
